# Supplementary material
Source: PubMed Central journal article supplement (PMC4220792)
Supplement: NIHMS638301-supplement-supplementary_material.pdf [file NIHMS638301-supplement-supplementary_material.pdf]

## Supplementary Materials for

### Casein Kinase I $\delta$ Mutations in Familial Migraine and Advanced Sleep Phase

K. C. Brennan, Emily A. Bates, Robert E. Shapiro, Jekaterina Zyuzin, William C. Hallows, Yong Huang, Hsien-Yang Lee, Christopher R. Jones, Ying-Hui Fu, Andrew C. Charles,\* Louis J. Ptáček\*

\*Corresponding author. E-mail: acharles@ucla.edu (A.C.C.); ljp@ucsf.edu (L.J.P.)

Published 1 May 2013, *Sci. Transl. Med.* **5**, 183ra56 (2013)  
DOI: 10.1126/scitranslmed.3005784

#### The PDF file includes:

- Fig. S1. Alignments for *Drosophila* Dbt and mouse (m) and human (h) CKI $\delta$  and CKI $\epsilon$  proteins.
- Fig. S2. Motor function in wild-type and CKI $\delta$ -T44A mice.
- Fig. S3. Gradient of CSD thresholds by sex and genotype.
- Fig. S4. Scatterplot of CSD dc shift duration and threshold in all animals.
- Fig. S5. Astrocyte ATP release evoked by low divalent cation solution.
- Table S1. Mechanical sensitivity thresholds.
- Table S2. Thermal responses.
- Table S3. CSD-associated measures in CKI $\delta$ -T44A mice and wild-type littermates.

Supplementary Figures S1-S5; Supplementary Tables S1-3.

```

                K5231
                K5579
                A R
hCK1 δ  GEEVAIKLECVKTKHPQLHIESKIYKMMQ
mCK1 δ  GEEVAIKLECVKTKHPQLHIESKIYKMMQ
hCK1 ε  GEEVAIKLECVKTKHPQLHIESKFKYKMMQ
mCK1 ε  GEEVAIKLECVKTKHPQLHIESKFKYKMMQ
DBT     GEEVAIKLECIRTKHPQLHIESKFKYKTMQ
          *****: *****: **:**

```

**Fig. S1.** Alignments for *Drosophila* Dbt and mouse (m) and human (h) CKI $\delta$  and CKI $\epsilon$  proteins. The T44A and H46R mutation sites are highlighted.

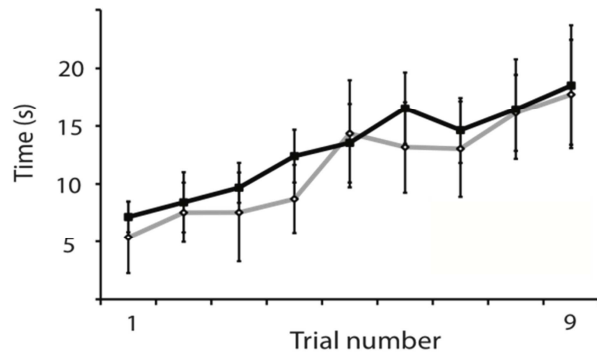

**Fig. S2.** Motor function in wild-type and CKIδ-T44A mice. Motor function was measured in CKIδ-T44A mice and wild-type littermates on Rotarod testing

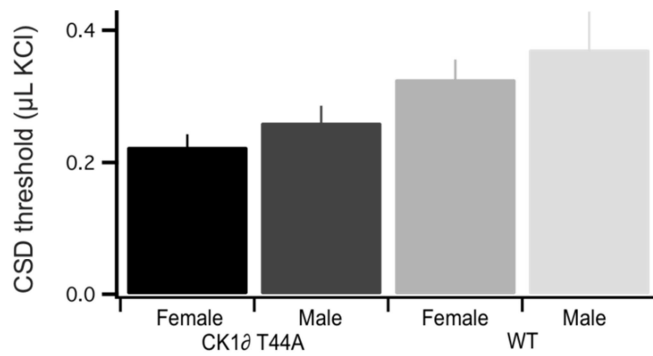

**Fig. S3.** Gradient of CSD thresholds by sex and genotype. There was an increase in CSD threshold from female CKI $\delta$ -T44A to male CKI $\delta$ -T44A to female WT to male WT animals, which was significant overall, but individually only female CKI $\delta$ -T44A and male wild-type differences were significant on post-hoc testing (see text).

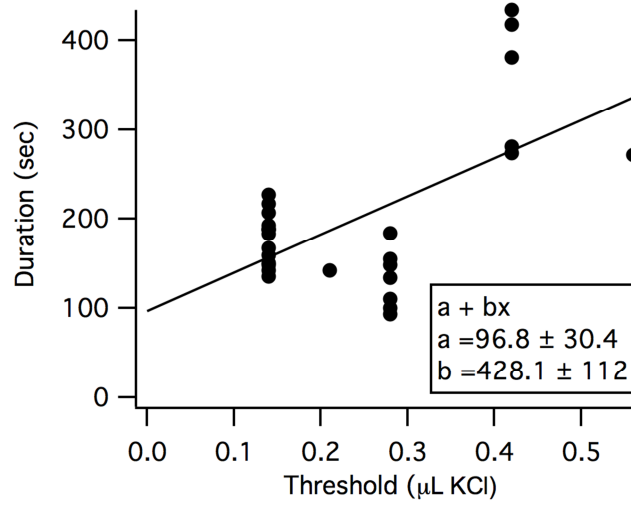

**Fig. S4.** Scatterplot of CSD dc shift duration and threshold in all animals. There is a positive correlation between volume of KCl ejected and duration of CSD. See text for details.

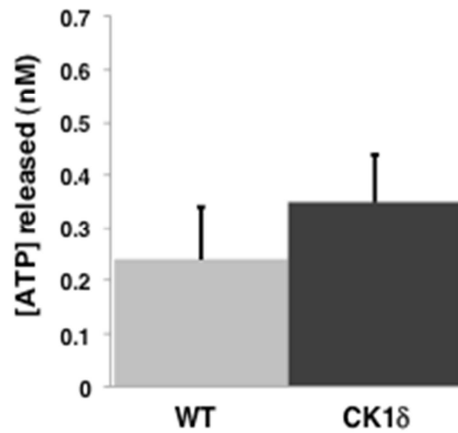

**Fig S5.** Astrocyte ATP release evoked by low divalent cation solution. Average concentration of ATP released in response to exposure of astrocytes to medium with no added  $\text{Ca}^{2+}$  or  $\text{Mg}^{2+}$  for 1 minute (error bars, SEM). There was no significant difference in the amount ATP released by astrocytes from CK1δ T44A mice vs. wild-type mice under these conditions.

**Table S1:** Mechanical sensitivity thresholds. Average difference in mechanical response (in grams) in wild-type and CKI $\delta$ -T44A **mice** at each time point. Estimates from the mixed model are presented with *P* values.

| Dose         | Baseline        |          | 60 Minutes      |          | 120 Minutes     |          | 240 Minutes     |          |
|--------------|-----------------|----------|-----------------|----------|-----------------|----------|-----------------|----------|
|              | WT-CK1 $\delta$ | <i>p</i> |
| Saline       | 0.03            | 0.74     | -0.01           | 0.94     | 0.20            | 0.05     | 0.05            | 0.68     |
| 1 mg/kg NTG  | 0.10            | 0.36     | 0.17            | 0.06     | 0.32            | <0.01    | 0.13            | 0.14     |
| 3 mg/kg NTG  | 0.13            | 0.15     | 0.15            | 0.03     | 0.22            | <0.01    | 0.20            | 0.02     |
| 5 mg/kg NTG  | 0.03            | 0.84     | 0.34            | <0.01    | 0.51            | <0.01    | 0.35            | <0.01    |
| 7 mg/kg NTG  | 0.08            | 0.39     | 0.07            | 0.18     | 0.05            | 0.28     | 0.09            | 0.06     |
| 10 mg/kg NTG | -0.05           | 0.48     | 0.08            | 0.01     | 0.02            | 0.34     | 0.07            | 0.08     |

**Table S2:** Thermal responses. Average difference in thermal response (in seconds) comparing wild-type and CKI $\delta$ -T44A mice.

| Dose         | Baseline        |          | 30 Minutes      |          | 60 Minutes      |          | 90 Minutes      |          | 120 Minutes     |          | 240 Minutes     |          |
|--------------|-----------------|----------|-----------------|----------|-----------------|----------|-----------------|----------|-----------------|----------|-----------------|----------|
|              | WT-CKI $\delta$ | <i>p</i> |
| Saline       | 0.75            | 0.17     | 0.05            | 0.93     | 0.81            | 0.13     | 0.97            | 0.06     | -0.08           | 0.89     | 1.28            | 0.02     |
| 1 mg/kg NTG  | -0.40           | 0.66     | 0.38            | 0.64     | -0.61           | 0.48     | -1.07           | 0.21     | 0.69            | 0.42     | 0.63            | 0.47     |
| 3 mg/kg NTG  | 0.46            | 0.58     | 1.24            | 0.07     | 1.27            | 0.07     | 2.09            | 0.01     | 3.39            | <0.01    | 2.84            | <0.01    |
| 5 mg/kg NTG  | -0.27           | 0.74     | 0.91            | 0.21     | 1.23            | 0.11     | 1.42            | 0.07     | 0.42            | 0.59     | 0.29            | 0.73     |
| 7 mg/kg NTG  | 0.91            | 0.34     | -0.31           | 0.71     | 1.89            | 0.02     | 0.21            | 0.81     | -0.34           | 0.70     | 1.17            | 0.21     |
| 10 mg/kg NTG | 0.48            | 0.57     | 1.26            | 0.07     | 1.28            | 0.07     | 2.11            | 0.01     | 3.41            | <0.01    | 2.86            | <0.01    |



**Table S3:** CSD-associated measures in CKI $\delta$ -T44A mice and wild-type littermates.

|            | Measure<br>(mean +/-<br>SEM) | <b>CKI<math>\delta</math>-<br/>T44A</b> | N (CSD;<br>animals) | <b>WT</b>   | N (CSD;<br>animals) | p value |
|------------|------------------------------|-----------------------------------------|---------------------|-------------|---------------------|---------|
| <b>OIS</b> | <b>Duration</b><br>(sec.)    | 311+/-20                                | 29; 9               | 433+/-35    | 17; 6               | 0.003   |
|            | <b>AUC</b><br>(a.u.)         | 61.3+/-16                               | 29; 9               | 61.6+/-21   | 17; 6               | 0.49    |
| <b>FP</b>  | <b>Duration</b><br>(sec.)    | 166+/-9                                 | 16; 6               | 253+/-32    | 12; 5               | 0.01    |
|            | <b>Amplitude</b><br>(mV)     | -12.1+/-0.6                             | 16; 6               | -12.8+/-0.9 | 12; 5               | 0.24    |

OIS: optical intrinsic signal; FP: field potential; AUC: area under the curve. P values:

Student's t-test.
